# Supplementary material for: The evolution of social parasitism in Formica ants revealed by a global phylogeny
Source: bioRxiv or medRxiv preprint supplement (doi:10.1101/2020.12.17.423324), 2021-02-15
Supplement: Supplementary file [file media-1.pdf]

The evolution of social parasitism in *Formica* ants revealed by a  
global phylogeny

—

Supplementary figures, tables, and references

Marek L. Borowiec  
Stefan P. Cover  
Christian Rabeling

## Supplementary Methods

### *Data availability*

Trimmed reads generated for this study are available at the NCBI Sequence Read Archive (to be submitted upon publication). Detailed voucher collection information, assembled sequences, analyzed matrices, configuration files and output of all analyses, and code used are available on Zenodo (DOI: [10.5281/zenodo.4341310](https://doi.org/10.5281/zenodo.4341310)).

### *Taxon sampling*

For this study we gathered samples collected in the past ~60 years which were available as either ethanol-preserved or point-mounted specimens. Taxon sampling comprises 101 newly sequenced ingroup morphospecies from all seven species groups of *Formica* ants [Creighton \(1950\)](#) that were recognized prior to our study and 8 outgroup species. Our sampling was guided by previous taxonomic and phylogenetic work [Creighton \(1950\)](#); [Francoeur \(1973\)](#); [Snelling and Buren \(1985\)](#); [Seifert \(2000, 2002, 2004\)](#); [Goropashnaya et al. \(2004, 2012\)](#); [Trager et al. \(2007\)](#); [Trager \(2013\)](#); [Seifert and Schultz \(2009a,b\)](#); [Muñoz-López et al. \(2012\)](#); [Antonov and Bukin \(2016\)](#); [Chen and Zhou \(2017\)](#); [Romiguier et al. \(2018\)](#) and included representatives from both the New and the Old World. Collection data associated with sequenced samples can be found in Table S1.

### *Molecular data collection and sequencing*

We performed non-destructive extraction and preserved same-specimen vouchers for each newly sequenced sample. We re-mounted all vouchers, assigned unique specimen identifiers (Table S1), and deposited them in the ASU Social Insect Biodiversity Repository (contact: Christian Rabeling, [christian.rabeling@asu.edu](mailto:christian.rabeling@asu.edu)). Detailed voucher collection data can be accessed at [10.5281/zenodo.4341310](https://doi.org/10.5281/zenodo.4341310). Briefly, we extracted DNA from all newly sequenced specimens using a DNeasy Blood and Tissue Kit (Qiagen, Valencia, CA, USA) and followed a library preparation protocol that follows was slightly modified from [Blaimer et al. \(2015\)](#). We used a KAPA Hyper Prep Library Kit (Kapa Biosystems, Inc., Wilmington, MA, USA) with magnetic bead cleanup [Fisher et al. \(2011\)](#) and a SPRI substitute [Rohland and Reich \(2012\)](#) as described in [Faircloth et al. \(2014\)](#). We used TruSeq adapters [Faircloth and Glenn \(2012\)](#) for ligation followed by PCR amplification of the library using a mix of HiFi HotStart polymerase reaction mix (Kapa Biosystems), Illumina TruSeq primers, and nuclease-free water.

We enriched each pool with 9,446 custom-designed probes (MYcroarray, Inc.) targeting 2,524 UCE loci in Hymenoptera [Branstetter et al. \(2017\)](#). We followed library enrichment procedures for the MYcroarray MYBaits kit [Blumenstiel et al. \(2010\)](#) except we used a 0.1× of the standard MYBaits concentration and added 0.7 μL of 500 μM custom blocking oligos designed against the custom sequence tags. We ran the hybridization reaction for 24 h at 65 °C, subsequently bound all pools to streptavidin beads (MyOne C1; Life Technologies) and washed bound libraries according to a standard target enrichment protocol [Blumenstiel et al. \(2010\)](#). We used the with-bead approach for PCR recovery of enriched libraries as described in [Faircloth \(2015\)](#).

We submitted pre-pooled libraries to the University of Utah High Throughput Genomics Core Facility for quality control on Agilent Bioanalyzer (Agilent Technologies, Santa Clara, CA, USA) and normalization. The pooled libraries were then sequenced using one full and one partial lane of a HiSeq 125 Cycle Paired-End Sequencing v4 run. Quality-trimmed sequence reads generated as part of this study are available from the NCBI Sequence Read Archive (to be submitted upon acceptance for publication).

### *Processing of UCE data*

We performed read cleaning, assembly, and matching of assembled contigs to UCE probes using Phyluce bioinformatics pipeline [Faircloth \(2015\)](#). We trimmed the FASTQ data using Illumiprocessor, a wrapper around Trimmomatic [Bolger et al. \(2014\)](#), with default settings (LEADING:5, TRAILING:15, SLIDING-WINDOW:4:15, MINLEN:40). Assemblies were done using Trinity v20140717 [Grabherr et al. \(2011\)](#) with the phyluce\_assembly\_assemble\_trinity wrapper. We then assessed orthology by matching the assembled contigs to enrichment probe sequences with phyluce\_assembly\_match\_contigs\_to\_probes (min\_coverage=50, min\_identity=80).

### *Alignment*

We used phylogeny-aware UPP workflow [Nguyen et al. \(2015\)](#) to align all UCE sequences. We used AMAS [Borowiec \(2016\)](#) for alignment wrangling and obtaining summary statistics and AliView [Larsson \(2014\)](#) for visualization. Although alignment trimming has been criticized in the past [Tan et al. \(2015\)](#), we decided to trim the alignments because of substantial computational burden associated with analysis of untreated data with high proportion of gaps. We used trimAl [Capella-Gutierrez et al. \(2009\)](#) and its “gappyout” algorithm, which is a relatively relaxed algorithm for removal of gappy sites. Visual inspection of alignments revealed that occasionally sequences were misaligned towards flanks. To automatically identify and discard the misaligned sequences we wrote a custom R script (R Core Team) that leveraged packages ape [Paradis et al. \(2004\)](#); [Paradis \(2012\)](#), seqinr [Charif and Lobry \(2007\)](#), doParallel, and plyr. The script first generates a matrix of uncorrected p-distances from a UCE locus alignment and for each taxon it computes average p-distance to all other taxa. Then it creates a distribution of average per-locus p-distances for each taxon and detects outliers defined as sequences that lay above 3 SD from the mean of that distribution. Once identified, the script removes outliers using AMAS. This procedure resulted in removal of 0.97 % of all sequences. For downstream analyses we retained only alignments that had 110 or more taxa (70 % of total), resulting in 2,242 loci on average 667 nt long. The resulting concatenated matrix was 1,497,044 nt long and contained 17.58 % of missing data and gaps.

### *Partitioning*

We used ModelFinder [Kalyaanamoorthy et al. \(2017\)](#) as implemented in IQ-TREE [Nguyen et al. \(2014\)](#). For each UCE we selected the best model under AICc. These models were then used for by-locus partitioned analysis of concatenated data matrix [Chernomor et al. \(2016\)](#). We have also employed the newly proposed strategy of partitioning UCE loci based on a sliding window approach that groups UCE sites with similar entropies [Tagliacollo and Lanfear \(2018\)](#). Unfortunately, many partitions identified using this approach were saturated and caused numerical instability in maximum likelihood analyses using IQ-TREE, resulting in unreasonably long tree lengths. We therefore proceeded with downstream analyses using per-locus partitioning.

### *Phylogenetic and concordance analyses using maximum likelihood*

We used IQ-TREE [Nguyen et al. \(2014\)](#) for maximum likelihood inference of phylogeny on single-locus alignments and concatenated data matrix. To test the robustness of the partitioned concatenated analysis, we performed unpartitioned analysis under HKY+4G model, which was the most common model identified as best under AICc for single loci. To assess the sensitivity of our results using measures other than bootstrap support we performed a quartet sampling analysis with 500 maximum replicates ([Pease et al., 2018](#)). Results are summarized in Figure S7.

### *Species tree analyses*

In addition to concatenated analyses we performed coalescent-based species tree estimation using ASTRAL-III (Zhang et al., 2018). Because summary coalescence methods such as ASTRAL have been shown to be negatively impacted by error in estimated gene trees Roch and Warnow (2015) we used the weighted statistical binning pipeline Mirarab et al. (2014); Bayzid et al. (2015). We collapsed all nodes with ultrafast bootstrap Minh et al. (2013) support below 95 for the binning pipeline, which resulted in identification of 1,733 supergenes containing from one to three UCE loci. We then used IQ-TREE to estimate supergene trees under a fully partitioned model (i.e. with branch lengths unlinked across partitions). Because of recent criticism of the statistical binning pipeline Adams and Castoe (2019) we also performed an analysis where raw trees from individual locus analyses were used. We mapped all terminals to putative species using morphology and the concatenated tree as guidance. Because some of the 101 species we recognized using morphology were non-monophyletic on the concatenated tree, we mapped the terminals onto 113 total monophyletic lineages representing putative species (Figures S4–S6). To test the effect of missing data Sayyari et al. (2017) on the position of *Formica talbotae* we performed additional analysis that used only the 67 loci which contained at least 50 % complete sequence for this taxon (Figure S6).

### *Divergence time inference*

For divergence time analyses we used a node dating approach, as implemented in MCMCTree, a part of the PAML package, v4.9e Yang (2007). MCMCTree utilized rapid approximate likelihood computation dos Reis and Yang (2011), which makes it suitable for divergence dating of genome-scale data sets dos Reis et al. (2012). We constrained our root node with soft bounds around a conservative maximum age estimate of 79 Ma, which corresponds to the lower bound of the 95 % highest posterior density interval for that split in Blaimer et al. (2015). Although *Formica* has a rich fossil record, the affinity of these fossils is uncertain because, as this study shows, morphology has thus far been misleading about phylogeny. Because of this, we conservatively constrained the split of *Polyergus* and *Formica*+*Iberoformica* to be at least 34 Ma, or one of the younger estimates for the age of Baltic amber Aleksandrova and Zaporozhets (2008a,b). We ran each analysis unpartitioned, under the HKY+4G model for 20 million generations. We examined each run's statistics in Tracer.

### *Biogeographic analyses*

For biogeographic inference we used BioGeoBEARS v1.1.2 Matzke (2013). We discretized the distribution of *Formica* species into two regions, the New World and Old World. Model selection implemented in BioGeoBEARS suggested DEC+J Matzke (2014) as the best-fitting model and we used it for all downstream analyses. We used 100 replicates of biogeographical stochastic maps Dupin et al. (2017) to estimate the number of times *Formica* dispersed between the Old and New World. We used our time-calibrated tree with taxon duplicates removed such that each species or putative species was represented by only one terminal. Results are summarized in Figure S2.

### *Ancestral state reconstruction*

In order to investigate the evolution of natural history traits in *Formica* and *Polyergus* we used stochastic character mapping (Huelsenbeck et al., 2003). We used the same time-calibrated tree as for biogeographic analyses but with distant (*Rossomyrmex minuchae* and *Proformica mongolica*) outgroups and *Formica* taxa for which we had insufficient life history data (see Table S2) pruned.

For each species we collected literature and previously unpublished field research data on nest structure, colony structure, and colony foundation mode. We discretized nest structure into three categories: i)

monodomous, ii) polydomous, and iii) supercolonial. For the analysis we assigned the highest nest structure complexity recorded, meaning that if a species is known to form monodomous, polydomous, or supercolonial nests, we characterized it as supercolonial. We discretized colony structure into i) monogynous or ii) polygynous. We assigned species to the polygynous category if they have been observed to be either monogynous or polygynous. We discretized colony founding mode into five categories: i) independent colony foundation via haplometrosis or pleometrosis, queen readoption occurs, budding absent or at low frequency, ii) facultative temporary social parasitism with budding at low frequency, iii) facultative temporary social parasitism with budding at high frequency, iv) obligate temporary social parasitism and dulosis without budding, v) permanent social parasitism. The coding of character states for each species and references to original research articles are available in Table S2.

We performed ancestral state reconstruction on each of the three characters (nest structure, colony structure, and colony founding). We first compared three commonly-used variants of the discrete character evolution Mk model (Lewis, 2001): all rates equal (character state change rates are equal for all states), symmetric transition rates (character state change rates are different for each pair of states), and all rates different (character state change rates are different for each transition). We also fit the meristic model (assuming characters change in step-wise fashion). We fit these four models using "fit" functions the R package GEIGER v2.0.6 (Harmon et al., 2007) to all three characters. We used Akaike Information Criterion corrected for sample size (AICc) weights as computed by the "aic.w" function in Phytools v0.6-44 (Revell, 2011) to see which model fit best. This approach identified the all rates different model to be the best fit for nest and colony structure and the symmetric model was found best-fitting for colony founding.

Ancestral reconstruction results are found in Figures S3-S5.



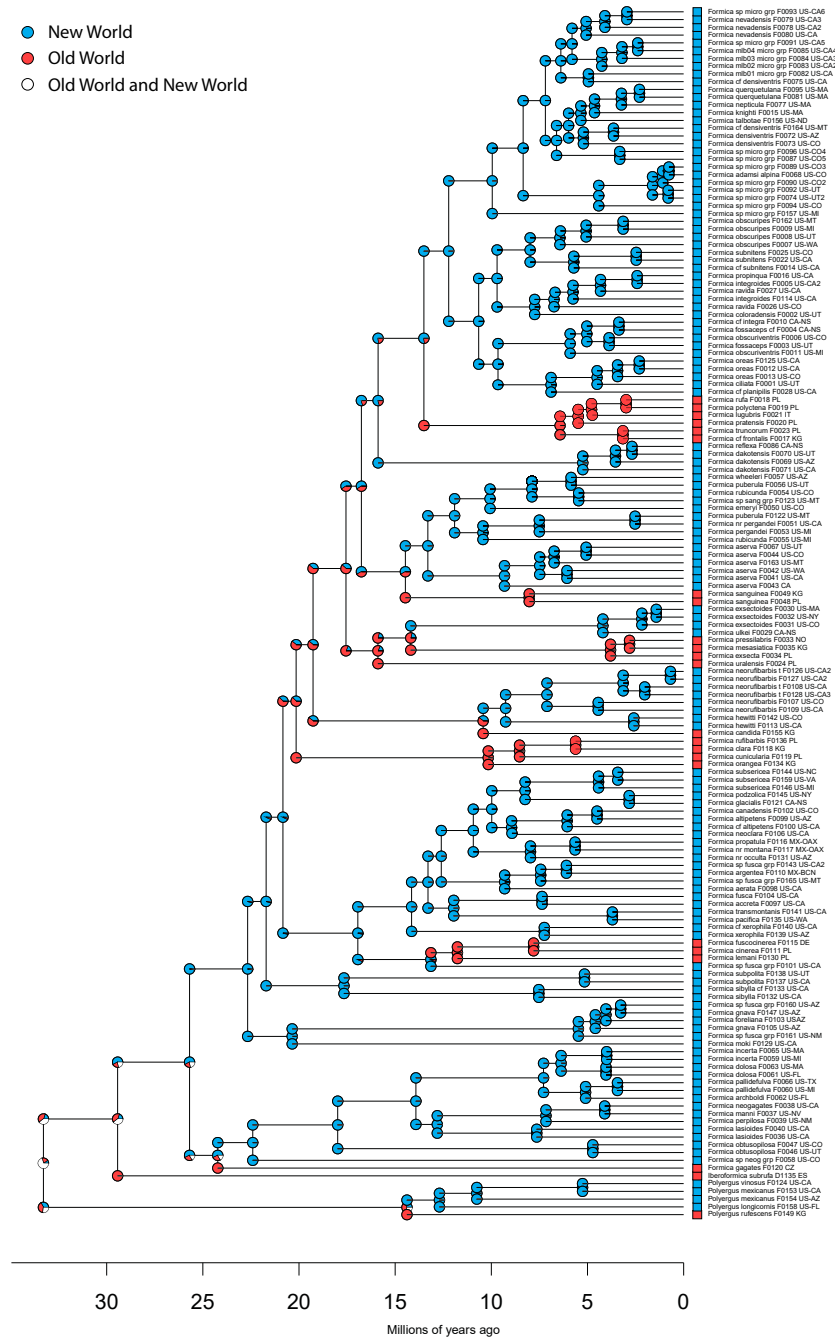

Supplementary Figure S2: Biogeographic history of *Formica*, *Iberoformica* and *Polyergus*. Pie charts depict relative likelihoods of range estimations from BioGeoBEARS under DEC+J. Pie charts at nodes correspond to ancestral state estimations and charts on the corners correspond to ranges immediately following speciation. Numbers preceded by the letter F indicate extraction code and correspond to identifiers in Table S1. Country and state/province codes as in main text Figure 1.

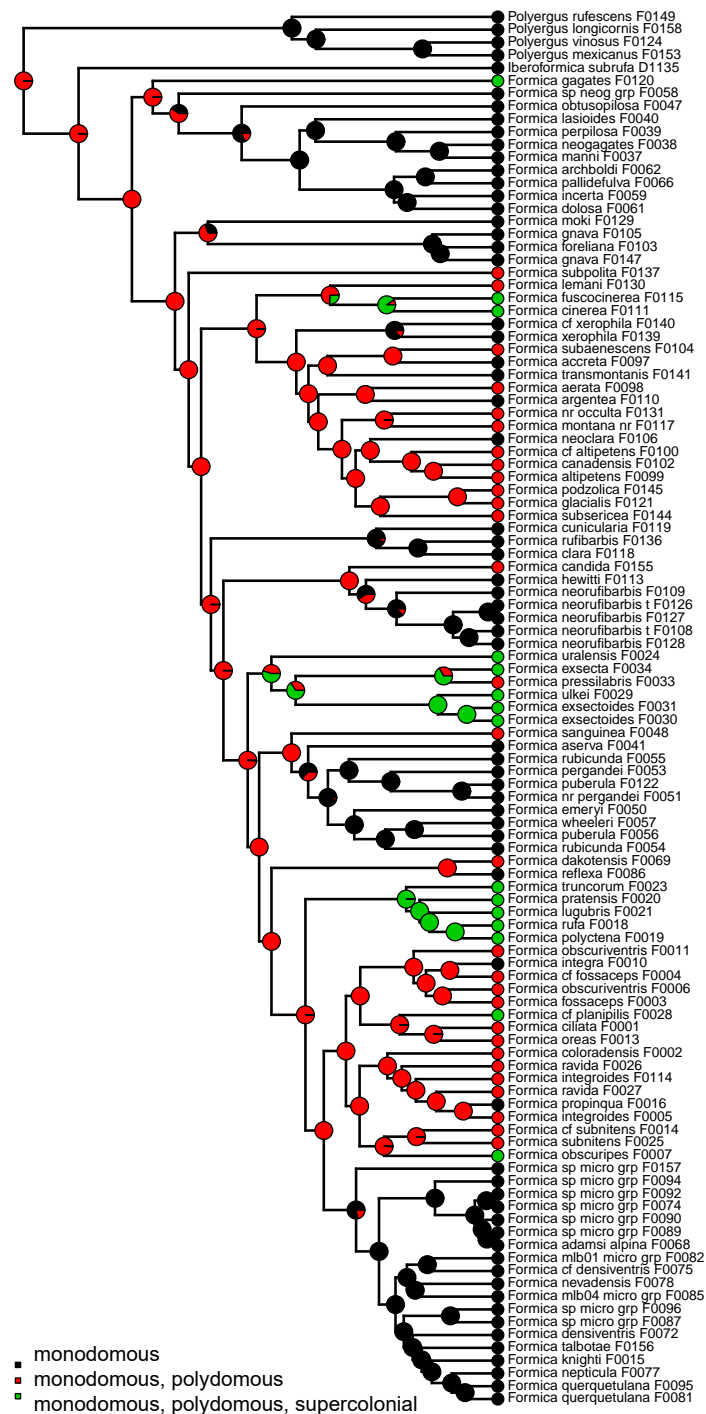

Supplementary Figure S3: Ancestral state reconstruction of nest structure using stochastic character mapping in Phytools of *Formica* nest structure under all rates different model. Pie charts at nodes correspond to ancestral state estimations and circles at tips correspond to states extant species. Numbers preceded by the letter F indicate extraction code and correspond to identifiers in Tables S1 and S2.



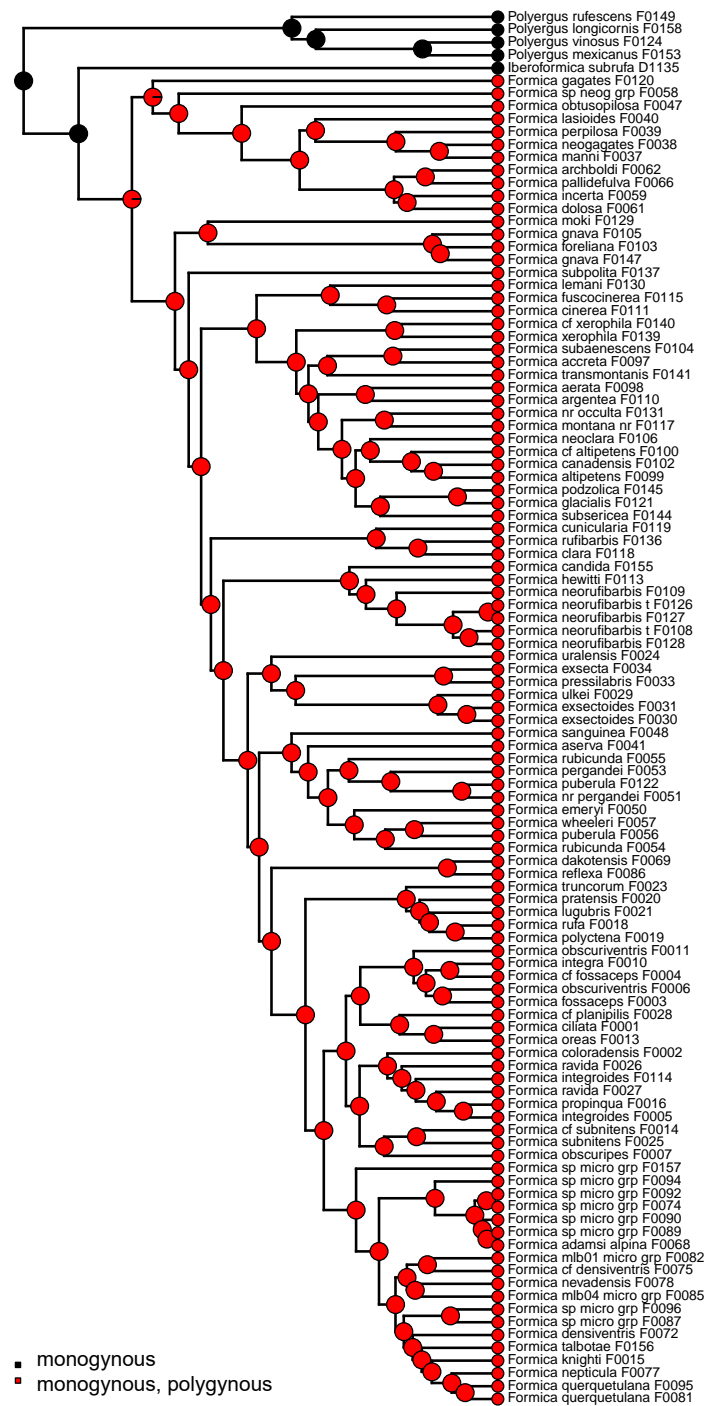

Supplementary Figure S4: Ancestral state reconstruction of colony structure using stochastic character mapping in Phytools of *Formica* colony structure under all rates different model. Pie charts at nodes correspond to ancestral state estimations and circles at tips correspond to states extant species. Numbers preceded by the letter F indicate extraction code and correspond to identifiers in Tables S1 and S2.

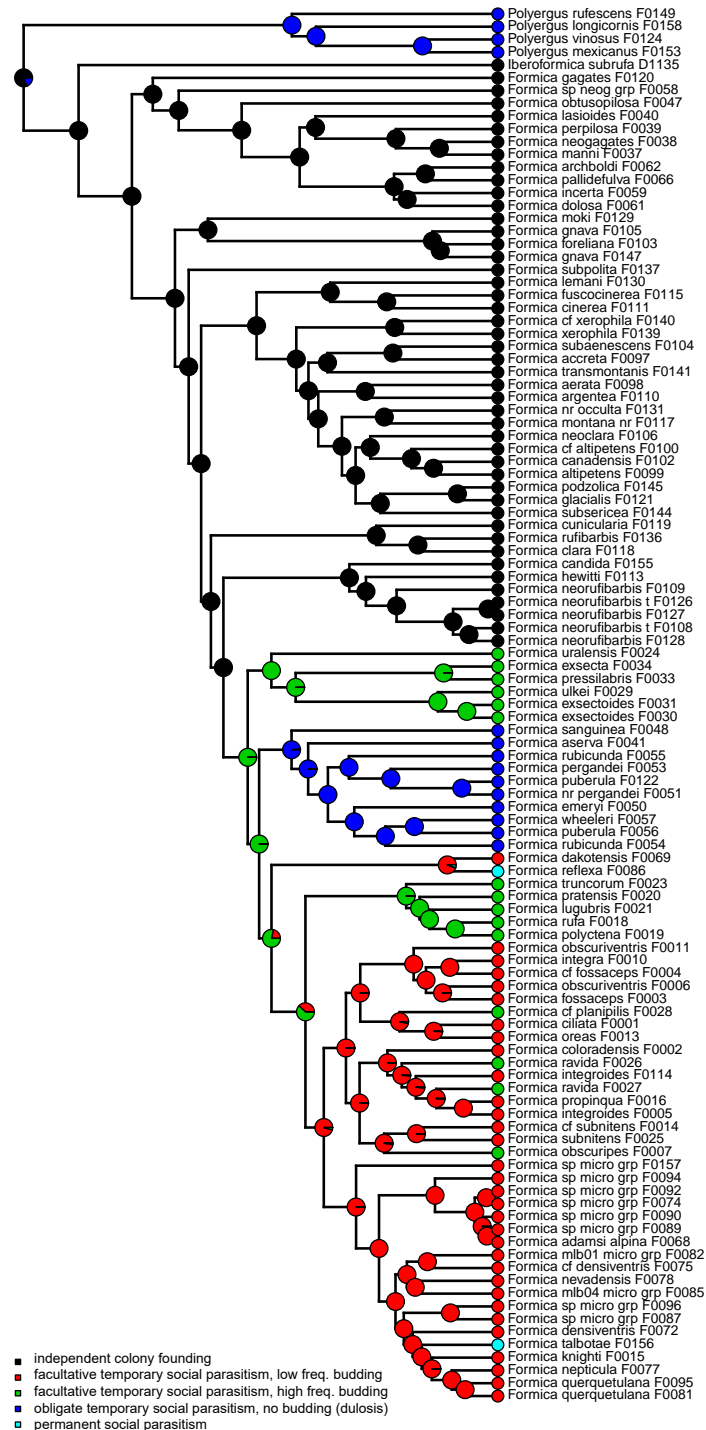

Supplementary Figure S5: Ancestral state reconstruction of colony founding mode using stochastic character mapping in Phytol of *Formica* colony founding under symmetrical rates model. Pie charts at the nodes correspond to ancestral state estimations and circles at tips correspond to states extant species. Numbers preceded by the letter F indicate extraction code and correspond to identifiers in Table S1 and S2.

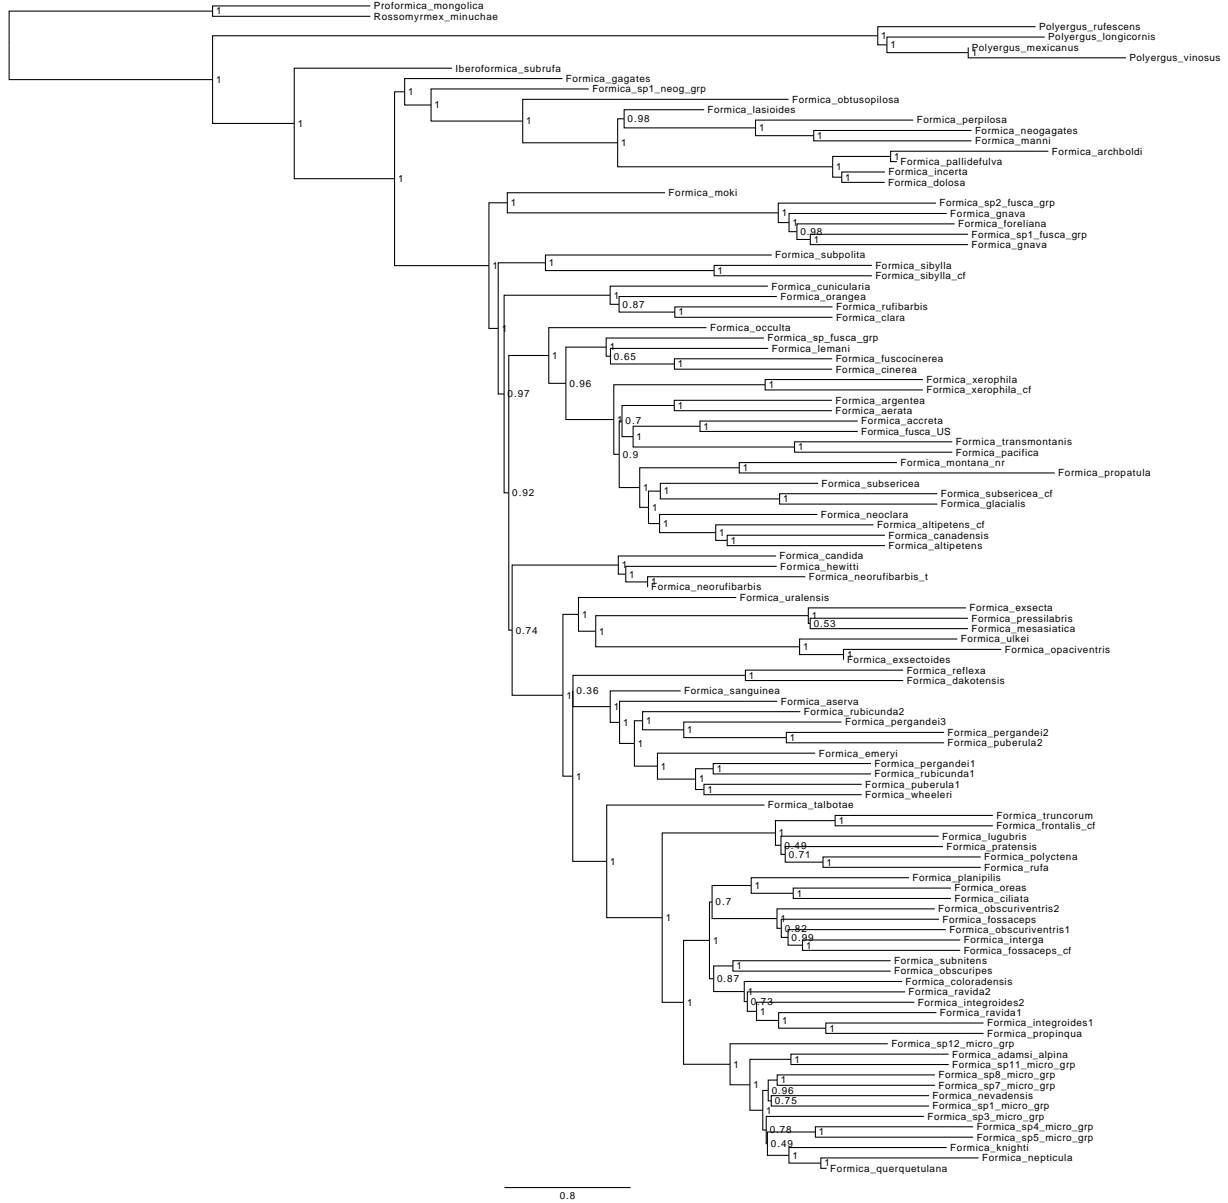

Supplementary Figure S6: Species tree inferred under coalescent using ASTRAL-III and 1,733 weighted supergene trees identified using statistical binning pipeline. Support is expressed in local posterior probability and branch lengths are in coalescent units.

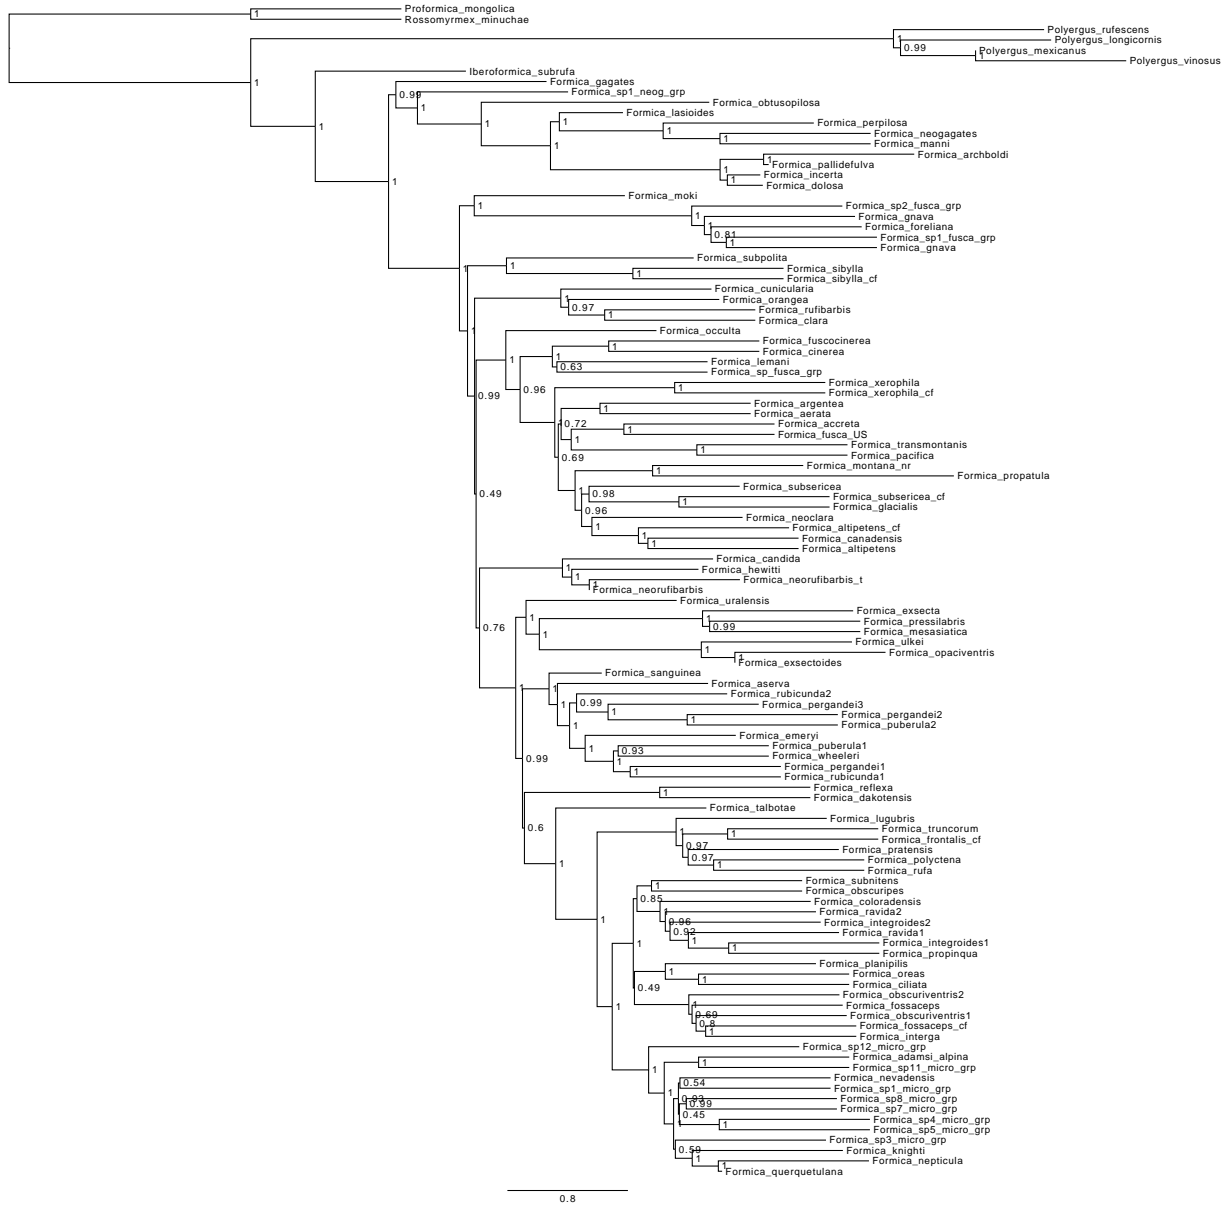

Supplementary Figure S7: Species tree inferred under coalescent using ASTRAL-III and all 2,242 individual UCE locus trees. Support is expressed in local posterior probability and branch lengths are in coalescent units.

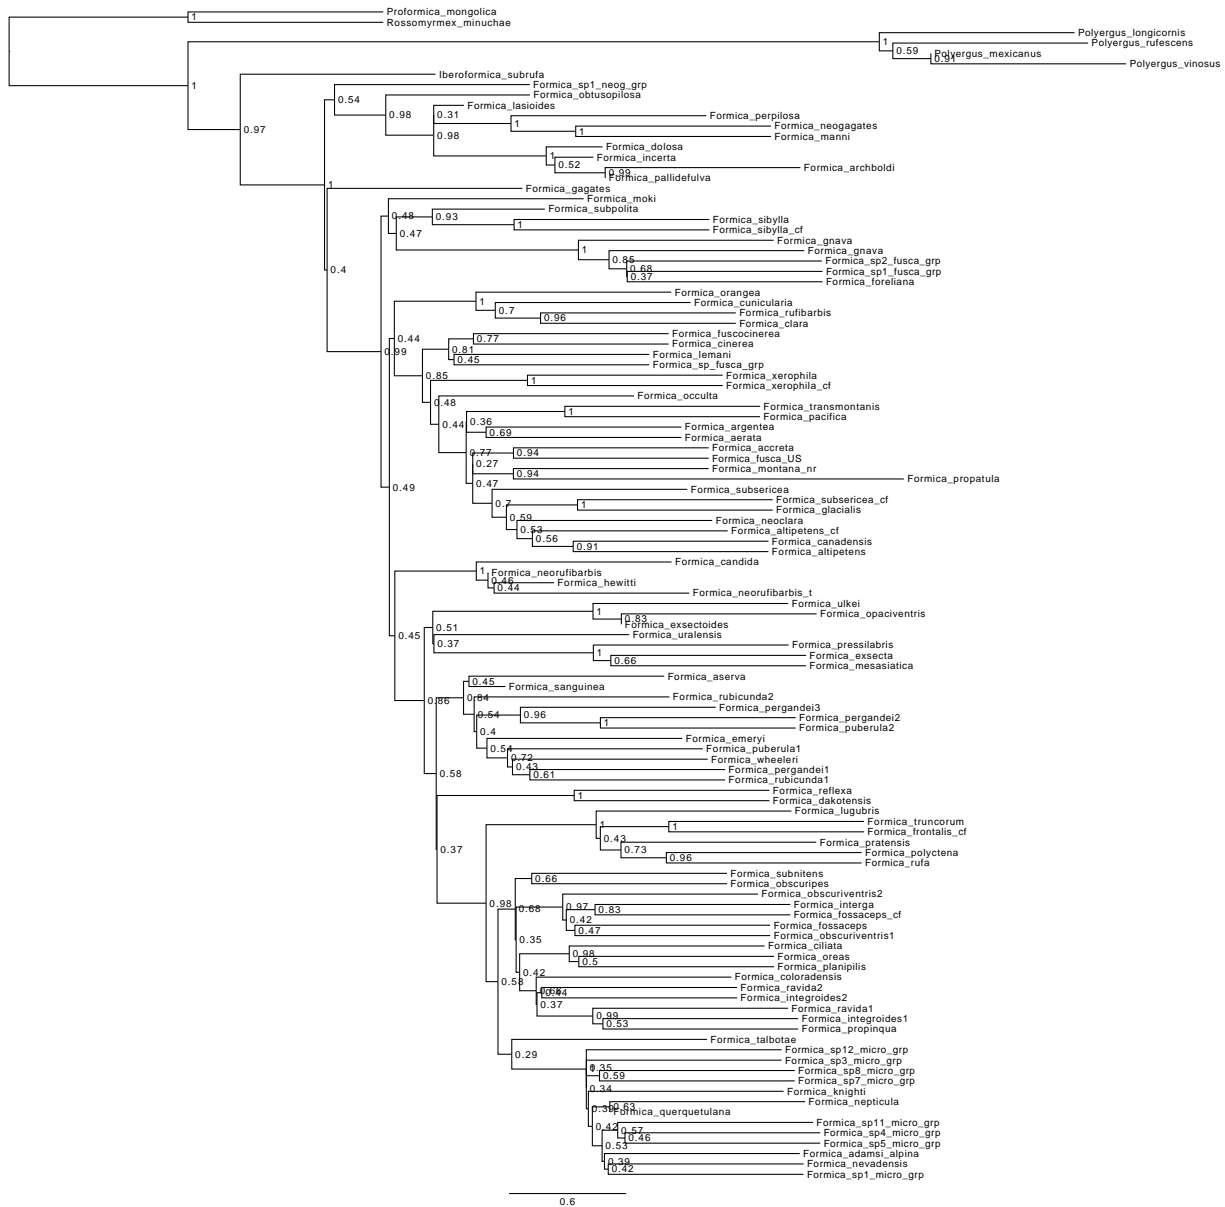

Supplementary Figure S8: Species tree inferred under coalescent using ASTRAL-III and 67 individual UCE locus trees for which at least 50 % of sequence length was available for *Formica talbotae*. Support is expressed in local posterior probability and branch lengths are in coalescent units.

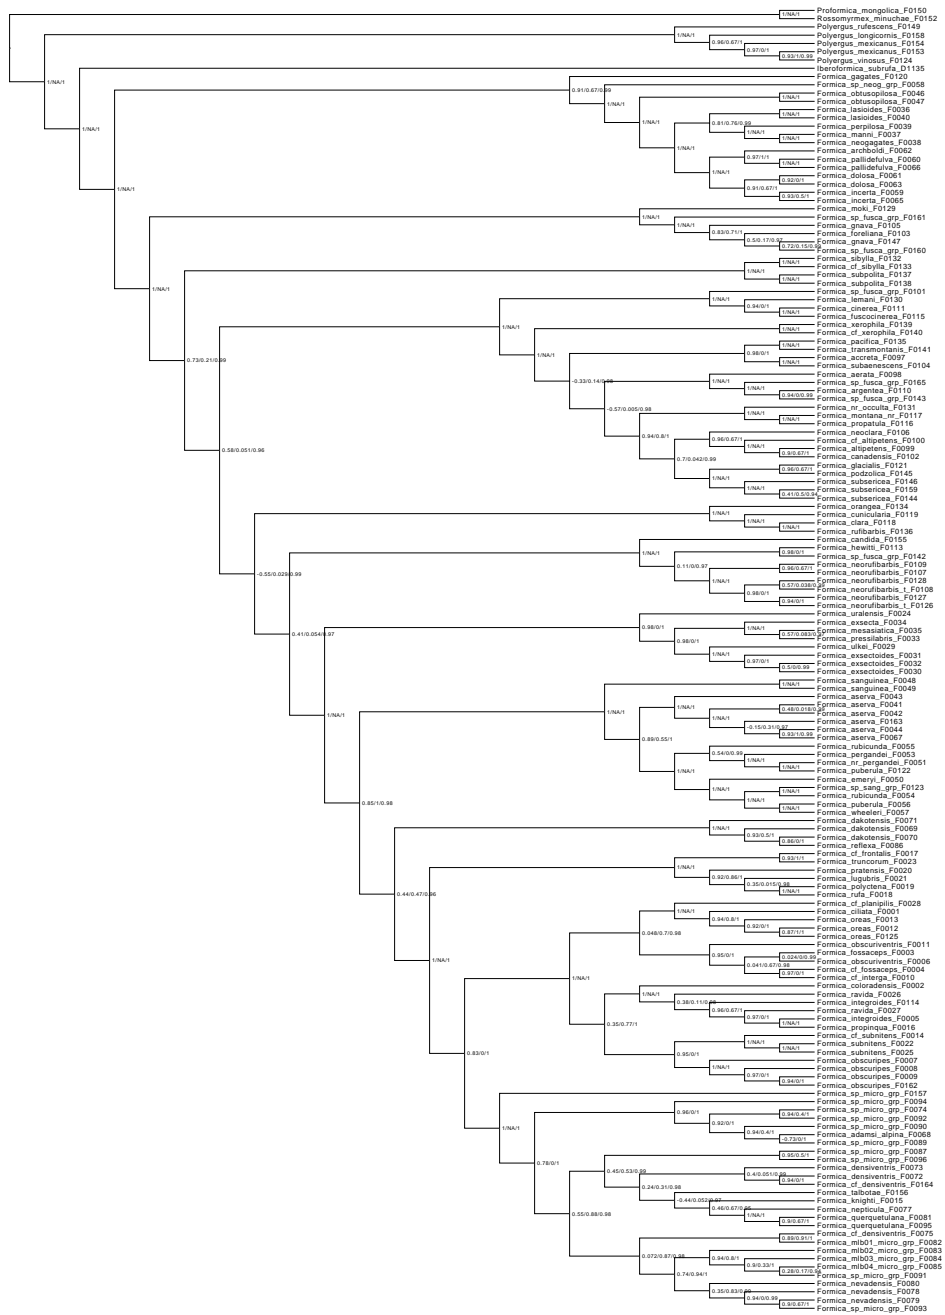

Supplementary Figure S9: Support from quartet sampling analyses. The values are: quartet concordance score (QC) / quartet differential score (QD) / quartet informativeness score (QI). Briefly, QC measures how often the concordant quartet topologies are inferred over discordant quartets in different replicates, with a value equal 1 when all replicates result in concordant topology, QD measures whether frequencies of two discordant topologies are equal (=1) or skewed (<1), and QI measures what proportion of replicates were informative. Contrast values for colony dependent clade or monophyly of *difficilis* group (1/NA/1), meaning that all replicates were informative and resulted in the same topology with support for placement of clade of Palearctic species related to *Formica rufibarbis* (-0.55/0.029/0.99) indicating that discordant topologies were inferred more often than those concordant with the input tree, that quartet topologies were highly skewed, but most replicates were informative. The former indicates maximal support, while the latter shows that the position of this clade within the "fusca grade" is highly uncertain, perhaps due to incomplete lineage sorting.

Supplementary Table S1: Voucher specimens used in this study. Detailed collection data can be accessed at Zenodo (DOI: [10.5281/zenodo.4341310](https://doi.org/10.5281/zenodo.4341310)).

| Extraction ID | Taxon                  | Specimen ID  | Country | Latitude | Longitude  |
|---------------|------------------------|--------------|---------|----------|------------|
| D1135         | Iberoformica subrufa   | ASU-SIBR2148 | ES      | 37.185   | -3.485     |
| F0001         | Formica ciliata        | ASU-SIBR2001 | US      | 38.26117 | -112.51433 |
| F0002         | Formica coloradensis   | ASU-SIBR2002 | US      | 38.42233 | -109.18017 |
| F0003         | Formica fossiceps      | ASU-SIBR2003 | US      | 38.39467 | -109.165   |
| F0004         | Formica cf fossiceps   | ASU-SIBR2004 | CA      | 44.53050 | -64.31912  |
| F0005         | Formica integroides    | ASU-SIBR2005 | US      | 38.67525 | -119.99428 |
| F0006         | Formica obscuriventris | ASU-SIBR2006 | US      | 39.12017 | -107.44767 |
| F0007         | Formica obscuripes     | ASU-SIBR2007 | US      | 48.1728  | -122.6714  |
| F0008         | Formica obscuripes     | ASU-SIBR2008 | US      | 38.23367 | -112.44917 |
| F0009         | Formica obscuripes     | ASU-SIBR2009 | US      | 42.44788 | -84.01688  |
| F0010         | Formica cf interga     | ASU-SIBR2010 | CA      | 44.68839 | -63.66808  |
| F0011         | Formica obscuriventris | ASU-SIBR2011 | US      | 42.45103 | -84.01878  |
| F0012         | Formica oreas          | ASU-SIBR2012 | US      | 38.67577 | -119.99431 |
| F0013         | Formica oreas          | ASU-SIBR2013 | US      | 38.84233 | -106.53817 |
| F0014         | Formica cf subnitens   | ASU-SIBR2014 | US      | 38.67757 | -119.98343 |
| F0015         | Formica knighti        | ASU-SIBR2015 | US      | 41.8652  | -70.64777  |
| F0016         | Formica propinqua      | ASU-SIBR2016 | US      | 39.44008 | -120.32349 |
| F0017         | Formica cf frontalis   | ASU-SIBR2017 | KG      | 42.8     | 77.47      |
| F0018         | Formica rufa           | ASU-SIBR2018 | PL      | 51.155   | 16.985     |
| F0019         | Formica polycytena     | ASU-SIBR2019 | PL      | 51.39    | 17.5       |
| F0020         | Formica pratensis      | ASU-SIBR2020 | PL      | 51.3867  | 16.805     |
| F0021         | Formica lugubris       | ASU-SIBR2021 | IT      | 46.586   | 12.105     |
| F0022         | Formica subnitens      | ASU-SIBR2022 | US      | 39.82308 | -120.13748 |
| F0023         | Formica truncorum      | ASU-SIBR2023 | PL      | 50.33    | 16.55      |
| F0024         | Formica uralensis      | ASU-SIBR2024 | PL      | 51.38    | 23.55      |
| F0025         | Formica subnitens      | ASU-SIBR2025 | US      | 39.591   | -108.818   |
| F0026         | Formica ravida         | ASU-SIBR2026 | US      | 39.1695  | -107.94817 |
| F0027         | Formica ravida         | ASU-SIBR2027 | US      | 39.43221 | -120.24265 |
| F0028         | Formica cf planipilis  | ASU-SIBR2028 | US      | 40.72538 | -120.20708 |
| F0029         | Formica ulkei          | ASU-SIBR2029 | CA      | 44.49808 | -63.92692  |
| F0030         | Formica exsectoides    | ASU-SIBR2030 | US      | 41.87383 | -70.65183  |
| F0031         | Formica exsectoides    | ASU-SIBR2031 | US      | 38.73367 | -104.896   |
| F0032         | Formica exsectoides    | ASU-SIBR2032 | US      | 43.01548 | -77.57365  |
| F0033         | Formica pressilabris   | ASU-SIBR2033 | SE      | 68.3381  | 18.7639    |
| F0034         | Formica exsecta        | ASU-SIBR2034 | PL      | 50.577   | 22.984     |
| F0035         | Formica mesasiatica    | ASU-SIBR2035 | KG      | 42.33    | 78.24      |
| F0036         | Formica lasioides      | ASU-SIBR2036 | US      | 33.18522 | -116.28849 |
| F0037         | Formica manni          | ASU-SIBR2037 | US      | 41.63632 | -119.84183 |
| F0038         | Formica neogagates     | ASU-SIBR2038 | US      | 39.42998 | -120.24087 |
| F0039         | Formica perpilosa      | ASU-SIBR2039 | US      | 31.83945 | -109.03615 |
| F0040         | Formica lasioides      | ASU-SIBR2040 | US      | 39.43163 | -120.24059 |
| F0041         | Formica aserva         | ASU-SIBR2041 | US      | 37.68319 | -119.17078 |
| F0042         | Formica aserva         | ASU-SIBR2042 | US      | 48.66648 | -122.96887 |
| F0043         | Formica aserva         | ASU-SIBR2043 | CA      | 44.46380 | -63.58094  |
| F0044         | Formica aserva         | ASU-SIBR2044 | US      | 38.81400 | -106.28217 |
| F0046         | Formica obtusopilosa   | ASU-SIBR2046 | US      | 38.71217 | -111.94833 |
| F0047         | Formica obtusopilosa   | ASU-SIBR2047 | US      | 39.50633 | -108.76217 |
| F0048         | Formica sanguinea      | ASU-SIBR2048 | PL      | 50.448   | 19.995     |
| F0049         | Formica sanguinea      | ASU-SIBR2049 | KG      | 42.67    | 77.18      |
| F0050         | Formica emeryi         | ASU-SIBR2050 | US      | 39.03167 | -104.79633 |
| F0051         | Formica nr pergandei   | ASU-SIBR2051 | US      | 39.21529 | -121.04322 |
| F0053         | Formica pergandei      | ASU-SIBR2053 | US      | 42.45278 | -84.01939  |
| F0054         | Formica rubicunda      | ASU-SIBR2054 | US      | 39.03033 | -105.44217 |
| F0055         | Formica rubicunda      | ASU-SIBR2055 | US      | 42.45919 | -84.01429  |
| F0056         | Formica puberula       | ASU-SIBR2056 | US      | 37.88800 | -109.45433 |
| F0057         | Formica wheeleri       | ASU-SIBR2057 | US      | 31.91433 | -109.271   |
| F0058         | Formica sp neog grp    | ASU-SIBR2058 | US      | 37.84367 | -109.36967 |
| F0059         | Formica incerta        | ASU-SIBR2059 | US      | 42.45151 | -84.01901  |
| F0060         | Formica pallidefulva   | ASU-SIBR2060 | US      | 42.45948 | -84.0256   |
| F0061         | Formica dolosa         | ASU-SIBR2061 | US      | 30.35995 | -84.41848  |
| F0062         | Formica archboldi      | ASU-SIBR2062 | US      | 30.35995 | -84.41848  |
| F0063         | Formica dolosa         | ASU-SIBR2063 | US      | 41.81444 | -70.66315  |
| F0065         | Formica incerta        | ASU-SIBR2065 | US      | 41.8652  | -70.64777  |

Supplementary Table S1: Voucher specimens used in this study, continued.

| Extraction ID | Taxon                          | Specimen ID  | Country | Latitude | Longitude  |
|---------------|--------------------------------|--------------|---------|----------|------------|
| F0066         | <i>Formica pallidefulva</i>    | ASU-SIBR2066 | US      | 30.2275  | -98.1788   |
| F0067         | <i>Formica aserva</i>          | ASU-SIBR2067 | US      | 38.66283 | -111.94117 |
| F0068         | <i>Formica adamsi alpina</i>   | ASU-SIBR2068 | US      | 38.39317 | -107.19683 |
| F0069         | <i>Formica dakotensis</i>      | ASU-SIBR2069 | US      | 34.02867 | -109.1855  |
| F0070         | <i>Formica dakotensis</i>      | ASU-SIBR2070 | US      | 38.63500 | -111.94817 |
| F0071         | <i>Formica dakotensis</i>      | ASU-SIBR2071 | US      | 39.41344 | -120.32162 |
| F0072         | <i>Formica densiventris</i>    | ASU-SIBR2072 | US      | 32.65729 | -109.85841 |
| F0073         | <i>Formica densiventris</i>    | ASU-SIBR2073 | US      | 39.75867 | -108.78783 |
| F0074         | <i>Formica sp micro grp</i>    | ASU-SIBR2074 | US      | 38.64883 | -111.94983 |
| F0075         | <i>Formica cf densiventris</i> | ASU-SIBR2075 | US      | 38.21541 | -119.74609 |
| F0077         | <i>Formica nepticala</i>       | ASU-SIBR2077 | US      | 41.87367 | -70.65233  |
| F0078         | <i>Formica nevadensis</i>      | ASU-SIBR2078 | US      | 39.35788 | -122.74716 |
| F0079         | <i>Formica nevadensis</i>      | ASU-SIBR2079 | US      | 41.56204 | -123.21177 |
| F0080         | <i>Formica nevadensis</i>      | ASU-SIBR2080 | US      | 39.41318 | -120.32038 |
| F0081         | <i>Formica querquetulana</i>   | ASU-SIBR2081 | US      | 41.87383 | -70.65183  |
| F0082         | <i>Formica mlb01 micro grp</i> | ASU-SIBR2082 | US      | 37.21317 | -118.64671 |
| F0083         | <i>Formica mlb02 micro grp</i> | ASU-SIBR2083 | US      | 40.94628 | -123.0427  |
| F0084         | <i>Formica mlb03 micro grp</i> | ASU-SIBR2084 | US      | 39.29111 | -120.67918 |
| F0085         | <i>Formica mlb04 micro grp</i> | ASU-SIBR2085 | US      | 39.40022 | -120.55818 |
| F0086         | <i>Formica reflexa</i>         | ASU-SIBR2086 | CA      | 44.53050 | -64.31912  |
| F0087         | <i>Formica sp micro grp</i>    | ASU-SIBR2087 | US      | 38.42033 | -107.62783 |
| F0089         | <i>Formica sp micro grp</i>    | ASU-SIBR2089 | US      | 38.18833 | -107.62067 |
| F0090         | <i>Formica sp micro grp</i>    | ASU-SIBR2090 | US      | 38.83800 | -106.56167 |
| F0091         | <i>Formica sp micro grp</i>    | ASU-SIBR2091 | US      | 38.83800 | -106.56167 |
| F0092         | <i>Formica sp micro grp</i>    | ASU-SIBR2092 | US      | 38.64983 | -111.95083 |
| F0093         | <i>Formica sp micro grp</i>    | ASU-SIBR2093 | US      | 41.56204 | -123.21177 |
| F0094         | <i>Formica sp micro grp</i>    | ASU-SIBR2094 | US      | 38.838   | -106.56167 |
| F0095         | <i>Formica querquetulana</i>   | ASU-SIBR2095 | US      | 41.87167 | -70.651    |
| F0096         | <i>Formica sp micro grp</i>    | ASU-SIBR2096 | US      | 39.04167 | -104.6615  |
| F0097         | <i>Formica accreta</i>         | ASU-SIBR2097 | US      | 39.30805 | -120.66831 |
| F0098         | <i>Formica aerata</i>          | ASU-SIBR2098 | US      | 37.80145 | -118.5299  |
| F0099         | <i>Formica altipetens</i>      | ASU-SIBR2099 | US      | 33.90683 | -109.1245  |
| F0100         | <i>Formica cf altipetens</i>   | ASU-SIBR2100 | US      | 38.6739  | -119.99411 |
| F0101         | <i>Formica sp fusca grp</i>    | ASU-SIBR2101 | US      | 37.38932 | -118.76612 |
| F0102         | <i>Formica canadensis</i>      | ASU-SIBR2102 | US      | 39.12017 | -107.44    |
| F0103         | <i>Formica foreliana</i>       | ASU-SIBR2103 | US      | 31.43100 | -111.16967 |
| F0104         | <i>Formica subaenescens</i>    | ASU-SIBR2104 | US      | 37.92051 | -122.57471 |
| F0105         | <i>Formica gnava</i>           | ASU-SIBR2105 | US      | 32.64983 | -109.81717 |
| F0106         | <i>Formica neoclara</i>        | ASU-SIBR2106 | US      | 39.50332 | -120.24157 |
| F0107         | <i>Formica neurufibarbis</i>   | ASU-SIBR2107 | US      | 38.71467 | -106.223   |
| F0108         | <i>Formica neurufibarbis t</i> | ASU-SIBR2108 | US      | 36.67239 | -118.34463 |
| F0109         | <i>Formica neurufibarbis</i>   | ASU-SIBR2109 | US      | 39.42505 | -120.24285 |
| F0110         | <i>Formica argentea</i>        | ASU-SIBR2110 | MX      | 31.00261 | -115.5497  |
| F0111         | <i>Formica cinerea</i>         | ASU-SIBR2111 | PL      | 51.39    | 17.5       |
| F0113         | <i>Formica hewitti</i>         | ASU-SIBR2113 | US      | 38.67984 | -119.98373 |
| F0114         | <i>Formica integroides</i>     | ASU-SIBR2114 | US      | 40.11490 | -120.32086 |
| F0115         | <i>Formica fuscocinerea</i>    | ASU-SIBR2115 | DE      | 48.16452 | 11.50075   |
| F0116         | <i>Formica proapatula</i>      | ASU-SIBR2116 | MX      | 17.1873  | -96.62085  |
| F0117         | <i>Formica montana nr</i>      | ASU-SIBR2117 | MX      | 17.61752 | -96.36799  |
| F0118         | <i>Formica clara</i>           | ASU-SIBR2118 | KG      | 42.66    | 77.47      |
| F0119         | <i>Formica cunicularia</i>     | ASU-SIBR2119 | PL      | 51.175   | 17.068     |
| F0120         | <i>Formica gagates</i>         | ASU-SIBR2120 | CZ      | 48.869   | 16.652     |
| F0121         | <i>Formica glacialis</i>       | ASU-SIBR2121 | CA      | 44.98735 | -64.06002  |
| F0122         | <i>Formica puberula</i>        | ASU-SIBR2122 | US      | 45.0446  | -110.68078 |
| F0123         | <i>Formica sp sang grp</i>     | ASU-SIBR2123 | US      | 45.13217 | -111.06283 |
| F0124         | <i>Polyergus vinosus</i>       | ASU-SIBR2124 | US      | 32.85323 | -116.43738 |
| F0125         | <i>Formica oreas</i>           | ASU-SIBR2125 | US      | 38.05273 | -119.32138 |
| F0126         | <i>Formica neurufibarbis t</i> | ASU-SIBR2126 | US      | 38.06165 | -119.34966 |
| F0127         | <i>Formica neurufibarbis</i>   | ASU-SIBR2127 | US      | 38.06207 | -119.34888 |
| F0128         | <i>Formica neurufibarbis</i>   | ASU-SIBR2128 | US      | 38.04167 | -119.29781 |
| F0129         | <i>Formica moki</i>            | ASU-SIBR2129 | US      | 38.9     | -121.02    |
| F0130         | <i>Formica lemani</i>          | ASU-SIBR2130 | PL      | 50.33    | 16.55      |



Supplementary Table S1: Voucher specimens used in this study, continued.

| Extraction ID | Taxon                          | Specimen ID  | Country | Latitude | Longitude  |
|---------------|--------------------------------|--------------|---------|----------|------------|
| F0131         | <i>Formica nr occulta</i>      | ASU-SIBR2131 | US      | 31.91375 | -109.26757 |
| F0132         | <i>Formica sibylla</i>         | ASU-SIBR2132 | US      | 39.43221 | -120.24258 |
| F0133         | <i>Formica cf sibylla</i>      | ASU-SIBR2133 | US      | 39.431   | -120.331   |
| F0134         | <i>Formica orangea</i>         | ASU-SIBR2134 | KG      | 42.6     | 75.85      |
| F0135         | <i>Formica pacifica</i>        | ASU-SIBR2135 | US      | 48.1728  | -122.6714  |
| F0136         | <i>Formica rufibarbis</i>      | ASU-SIBR2136 | PL      | 52.76917 | 14.30778   |
| F0137         | <i>Formica subpolita</i>       | ASU-SIBR2137 | US      | 39.50444 | -120.23817 |
| F0138         | <i>Formica subpolita</i>       | ASU-SIBR2138 | US      | 38.72450 | -112.20717 |
| F0139         | <i>Formica xerophila</i>       | ASU-SIBR2139 | US      | 35.80350 | -112.11767 |
| F0140         | <i>Formica cf xerophila</i>    | ASU-SIBR2140 | US      | 38.85876 | -122.41834 |
| F0141         | <i>Formica transmontanis</i>   | ASU-SIBR2141 | US      | 39.188   | -123.757   |
| F0142         | <i>Formica sp fusca grp</i>    | ASU-SIBR2142 | US      | 38.83767 | -106.55933 |
| F0143         | <i>Formica sp fusca grp</i>    | ASU-SIBR2143 | US      | 39.21533 | -121.04019 |
| F0144         | <i>Formica subsericea</i>      | ASU-SIBR2144 | US      | 35.695   | -78.69688  |
| F0145         | <i>Formica podzolica</i>       | ASU-SIBR2145 | US      | 43.01616 | -77.57632  |
| F0146         | <i>Formica subsericea</i>      | ASU-SIBR2146 | US      | 42.45103 | -84.01885  |
| F0147         | <i>Formica gnava</i>           | ASU-SIBR2147 | US      | 31.93200 | -109.17783 |
| F0149         | <i>Polyergus rufescens</i>     | ASU-SIBR2150 | KG      | 42.67    | 77.18      |
| F0150         | <i>Proformica mongolica</i>    | ASU-SIBR2151 | KG      | 42.77    | 74.66      |
| F0152         | <i>Rossomyrmex minuchae</i>    | ASU-SIBR2153 | ES      | 36.89    | -2.78      |
| F0153         | <i>Polyergus mexicanus</i>     | ASU-SIBR2154 | US      | 39.41591 | -120.31704 |
| F0154         | <i>Polyergus mexicanus</i>     | ASU-SIBR2155 | US      | 31.90882 | -109.25211 |
| F0155         | <i>Formica candida</i>         | ASU-SIBR2156 | KG      | 42.08    | 76.73      |
| F0156         | <i>Formica talbotae</i>        | ASU-SIBR2157 | US      | 43.38    | -95.185    |
| F0157         | <i>Formica sp micro grp</i>    | ASU-SIBR2158 | US      | 42.45947 | -84.02559  |
| F0158         | <i>Polyergus longicornis</i>   | ASU-SIBR2159 | US      | 30.35995 | -84.41848  |
| F0159         | <i>Formica subsericea</i>      | ASU-SIBR2160 | US      | 38.9879  | -77.2495   |
| F0160         | <i>Formica sp fusca grp</i>    | ASU-SIBR2161 | US      | 31.8729  | -109.23504 |
| F0161         | <i>Formica sp fusca grp</i>    | ASU-SIBR2162 | US      | 32.59105 | -107.97398 |
| F0162         | <i>Formica obscuripes</i>      | ASU-SIBR2163 | US      | 48.03381 | -110.22798 |
| F0163         | <i>Formica aserva</i>          | ASU-SIBR2164 | US      | 46.7059  | -114.53617 |
| F0164         | <i>Formica cf densiventris</i> | ASU-SIBR2165 | US      | 38.10233 | -111.33653 |
| F0165         | <i>Formica sp fusca grp</i>    | ASU-SIBR2166 | US      | 48.52302 | -113.3808  |



## Supplementary references

- Adams, R. H. and Castoe, T. A. (2019). Statistical binning leads to profound model violation due to gene tree error incurred by trying to avoid gene tree error. *Molecular Phylogenetics and Evolution*, 134:164–171.
- Aleksandrova, G. N. and Zaporozhets, N. I. (2008a). Palynological characteristics of Upper Cretaceous and Paleogene deposits on the west of the Sambian Peninsula (Kaliningrad region), Part 1. *Stratigraphy and Geological Correlation*, 16(3):295–316.
- Aleksandrova, G. N. and Zaporozhets, N. I. (2008b). Palynological characteristics of Upper Cretaceous and Paleogene deposits on the west of the Sambian Peninsula (Kaliningrad region), Part 2. *Stratigraphy and Geological Correlation*, 16(5):528–539.
- Antonov, I. A. and Bukin, Y. S. (2016). Molecular phylogenetic analysis of the ant genus *Formica* L. (Hymenoptera: Formicidae) from Palearctic region. *Russian Journal of Genetics*, 52(8):810–820.
- Bayzid, M. S., Mirarab, S., Boussau, B., and Warnow, T. (2015). Weighted statistical binning: enabling statistically consistent genome-scale phylogenetic analyses. *PLoS ONE*, 10(6):e0129183.
- Bernard, F. (1967). *Faune de l'Europe et du Bassin Méditerranéen. 3. Les fourmis (Hymenoptera Formicidae) d'Europe occidentale et septentrionale*. Masson, Paris.
- Blaimer, B. B., Brady, S. G., Schultz, T. R., Lloyd, M. W., Fisher, B. L., and Ward, P. S. (2015). Phylogenomic methods outperform traditional multi-locus approaches in resolving deep evolutionary history: a case study of formicine ants. *BMC Evolutionary Biology*, 15:e271.
- Blumenstiel, B., Cibulskis, K., Fisher, S., DeFelice, M., Barry, A., Fennell, T., Abreu, J., Minie, B., Costello, M., Young, G., Maquire, J., Kernysky, A., Melnikov, A., Rogov, P., Gnirke, A., and Gabriel, S. (2010). Targeted exon sequencing by in-solution hybrid selection. *Current Protocols in Human Genetics*, 66(1):18.4.1–18.4.24.
- Bolger, A. M., Lohse, M., and Usadel, B. (2014). Trimmomatic: a flexible trimmer for Illumina sequence data. *Bioinformatics*, 30(15):2114–2120.
- Borowiec, M. L. (2016). AMAS: a fast tool for alignment manipulation and computing of summary statistics. *PeerJ*, 4:e1660.
- Branstetter, M. G., Longino, J. T., Ward, P. S., and Faircloth, B. C. (2017). Enriching the ant tree of life: enhanced UCE bait set for genome-scale phylogenetics of ants and other Hymenoptera. *Methods in Ecology and Evolution*, 9(6):768–776.
- Brown, W. D. and Keller, L. (2000). Colony sex ratios vary with queen number but not relatedness asymmetry in the ant *Formica exsecta*. *Proceedings of the Royal Society of London. Series B: Biological Sciences*, 267(1454):1751–1757.
- Buren, W. F. (1942). New ants from Minnesota, Iowa, and Wisconsin. *Iowa State College Journal of Science*, 16(3):399–408.
- Buren, W. F. (1944). A list of iowa ants. *Iowa State College Journal of Science*, (18):277–312.
- Busch, T. (1998). Hinweise zur Verbreitung von *Formica uralensis* Ruzsky, 1895-Myrmekologische Notizen aus Mecklenburg-Vorpommern (Hymenoptera, Formicidae). *Ameisenschutz Aktuell*, 12(1):1–11.
- Capella-Gutierrez, S., Silla-Martinez, J. M., and Gabaldon, T. (2009). trimAl: a tool for automated alignment trimming in large-scale phylogenetic analyses. *Bioinformatics*, 25(15):1972–1973.
- Charif, D. and Lobry, J. R. (2007). *SeqinR 1.0-2: A Contributed Package to the R Project for Statistical Computing Devoted to Biological Sequences Retrieval and Analysis*, pages 207–232. Springer Berlin

- Heidelberg, Berlin, Heidelberg.
- Chen, Y. and Zhou, S. (2017). Phylogenetic relationships based on DNA barcoding among 16 species of the ant genus *Formica* (Hymenoptera: Formicidae) from China. *Journal of Insect Science*, 17(6):117.
- Chernomor, O., von Haeseler, A., and Minh, B. Q. (2016). Terrace aware data structure for phylogenomic inference from supermatrices. *Systematic Biology*, 65(6):997–1008.
- Collingwood, C. A. (1979). The Formicidae (Hymenoptera) of Fennoscandia and Denmark. *Fauna Entomologica Scandinavica*, (8):1–174.
- Creighton, W. S. (1940). A revision of the North American variants of the ant *Formica rufa*. *American Museum Novitates*, (1055):1–10.
- Creighton, W. S. (1950). The ants of North America. *Bulletin of the Museum of Comparative Zoology*, 104:1–585.
- dos Reis, M., Inoue, J., Hasegawa, M., Asher, R. J., Donoghue, P. C. J., and Yang, Z. (2012). Phylogenomic datasets provide both precision and accuracy in estimating the timescale of placental mammal phylogeny. *Proceedings of the Royal Society B: Biological Sciences*, 279(1742):3491–3500.
- dos Reis, M. and Yang, Z. (2011). Approximate likelihood calculation on a phylogeny for bayesian estimation of divergence times. *Molecular Biology and Evolution*, 28(7):2161–2172.
- Dupin, J., Matzke, N. J., Särkinen, T., Knapp, S., Olmstead, R. G., Bohs, L., and Smith, S. D. (2017). Bayesian estimation of the global biogeographical history of the Solanaceae. *Journal of Biogeography*, 44(4):887–899.
- Faircloth, B. C. (2015). PHYLUCE is a software package for the analysis of conserved genomic loci. *Bioinformatics*, 32(5):786–788.
- Faircloth, B. C., Branstetter, M. G., White, N. D., and Brady, S. G. (2014). Target enrichment of ultraconserved elements from arthropods provides a genomic perspective on relationships among Hymenoptera. *Molecular Ecology Resources*, 15(3):489–501.
- Faircloth, B. C. and Glenn, T. C. (2012). Not all sequence tags are created equal: designing and validating sequence identification tags robust to indels. *PLoS ONE*, 7(8):e42543.
- Fisher, S., Barry, A., Abreu, J., Minie, B., Nolan, J., Delorey, T. M., Young, G., Fennell, T. J., Allen, A., Ambrogio, L., Berlin, A. M., Blumenstiel, B., Cibulskis, K., Friedrich, D., Johnson, R., Juhn, F., Reilly, B., Shammas, R., Stalker, J., Sykes, S. M., Thompson, J., Walsh, J., Zimmer, A., Zwirko, Z., Gabriel, S., Nicol, R., and Nusbaum, C. (2011). A scalable, fully automated process for construction of sequence-ready human exome targeted capture libraries. *Genome Biology*, 12(1):R1.
- Francoeur, A. (1973). Révision taxonomique des espèces néarctiques du groupe *fusca*, genre *Formica* (Formicidae, Hymenoptera). *Mémoires de la Société Entomologique du Québec*, (3):1–316.
- Frumhoff, P. C. and Ward, P. S. (1992). Individual-level selection, colony-level selection, and the association between polygyny and worker monomorphism in ants. *American Naturalist*, 139(3):559–590.
- Galkowski, C., Lebas, C., Wegnez, P., Lenoir, A., and Blatrix, R. (2017). Redescription of *Proformica nasuta* (Nylander, 1856) (Hymenoptera, Formicidae) using an integrative approach. *European Journal of Taxonomy*, (290).
- Gammans, N. (2008). Conserving the red-barbed ant (*Formica rufibarbis*) in the United Kingdom. Technical report.
- Gardner, M., Schönrogge, K., Elmes, G., and Thomas, J. (2006). Increased genetic diversity as a defence

- against parasites is undermined by social parasites: *Microdon mutabilis* hoverflies infesting *Formica lemani* ant colonies. *Proceedings of the Royal Society B: Biological Sciences*, 274(1606):103–110.
- Goropashnaya, A. V., Fedorov, V. B., and Pamilo, P. (2004). Recent speciation in the *Formica rufa* group ants (Hymenoptera, Formicidae): inference from mitochondrial DNA phylogeny. *Molecular Phylogenetics and Evolution*, 32(1):198–206.
- Goropashnaya, A. V., Fedorov, V. B., Seifert, B., and Pamilo, P. (2012). Phylogenetic relationships of Palaearctic *Formica* species (Hymenoptera, Formicidae) based on mitochondrial cytochrome B sequences. *PloS ONE*, 7(7):e41697.
- Goropashnaya, A. V., Seppä, P., and Pamilo, P. (2001). Social and genetic characteristics of geographically isolated populations in the ant *Formica cinerea*. *Molecular Ecology*, 10(12):2807–2818.
- Goryunov, D. N. (2015). Nest-building in ants *Formica exsecta* (Hymenoptera, Formicidae). *Entomological Review*, 95(8):953–958.
- Gösswald, K. (2012). *Die Waldameise: Biologie, Ökologie und forstliche Nutzung*. AULA-Verlag, Wiesbaden.
- Grabherr, M. G., Haas, B. J., Yassour, M., Levin, J. Z., Thompson, D. A., Amit, I., Adiconis, X., Fan, L., Raychowdhury, R., Zeng, Q., Chen, Z., Mauceli, E., Hacohen, N., Gnirke, A., Rhind, N., di Palma, F., Birren, B. W., Nusbaum, C., Lindblad-Toh, K., Friedman, N., and Regev, A. (2011). Full-length transcriptome assembly from RNA-seq data without a reference genome. *Nature Biotechnology*, 29(7):644–652.
- Gyllenstrand, N. and Seppä, P. (2003). Conservation genetics of the wood ant, *Formica lugubris*, in a fragmented landscape. *Molecular Ecology*, 12(11):2931–2940.
- Haag-Liautard, C., Pedersen, J. S., Ovaskainen, O., and Keller, L. (2008). Breeding system and reproductive skew in a highly polygynous ant population. *Insectes Sociaux*, 55(4):347–354.
- Harmon, L. J., Weir, J. T., Brock, C. D., Glor, R. E., and Challenger, W. (2007). GEIGER: investigating evolutionary radiations. *Bioinformatics*, 24(1):129–131.
- Holmquist, A. M. (1928). Notes on the life history and habits of the mound-building ant, *Formica ulkei* Emery. *Ecology*, 9(1):70–87.
- Holmquist, A. M. (1994). Untersuchungen zur Gründung neuer Völker bei *Formica pratensis* Retzius (Hymenoptera, Formicidae). *Waldhygiene*, 20:43–56.
- Huelsenbeck, J. P., Nielsen, R., and Bollback, J. P. (2003). Stochastic mapping of morphological characters. *Systematic Biology*, 52(2):131–158.
- Ito, F. and Higashi, S. (1990). Temporary social parasitism in the enslaving ant species *Formica sanguinea* Latreille: an important discovery related to the evolution of dulosis in *Formica* ants. *Journal of Ethology*, 8(1):33–35.
- Kalyaanamoorthy, S., Minh, B. Q., Wong, T. K., von Haeseler, A., and Jermin, L. S. (2017). ModelFinder: fast model selection for accurate phylogenetic estimates. *Nature Methods*, 14(6):587.
- Kennedy, C. H. and Dennis, C. A. (1937). New ants from Ohio and Indiana, *Formica prociliata*, *F. querquetulana*, *F. postoculata* and *F. lecontei*, (Formicidae: Hymenoptera). *Annals of the Entomological Society of America*, (30):531–544.
- Larsson, A. (2014). AliView: a fast and lightweight alignment viewer and editor for large datasets. *Bioinformatics*, 30(22):3276–3278.
- Lewis, P. O. (2001). A likelihood approach to estimating phylogeny from discrete morphological character

- data. *Systematic Biology*, 50(6):913–925.
- Lindström, K., Berglind, S. Å., and Pamilo, P. (1996). Variation of colony types in the ant *Formica cinerea*. *Insectes Sociaux*, 43(3):329–332.
- MacKay, W. and Mackay, E. (2002). *The ants of New Mexico (Hymenoptera: Formicidae)*. Edwin Mellen Press, Lewiston, New York.
- Maeder, A. and Cherix, D. (2001). Problèmes posés par *Formica paralugubris*, une nouvelle espèce de fourmis des bois. *Actes des Colloques Insectes Sociaux*, (14):21–25.
- Matzke, N. J. (2013). *Probabilistic historical biogeography: new models for founder-event speciation, imperfect detection, and fossils allow improved accuracy and model-testing*. University of California, Berkeley.
- Matzke, N. J. (2014). Model selection in historical biogeography reveals that founder-event speciation is a crucial process in island clades. *Systematic Biology*, 63(6):951–970.
- Minh, B. Q., Nguyen, M. A. T., and von Haeseler, A. (2013). Ultrafast approximation for phylogenetic bootstrap. *Molecular Biology and Evolution*, 30(5):1188–1195.
- Mirarab, S., Bayzid, M. S., Boussau, B., and Warnow, T. (2014). Statistical binning enables an accurate coalescent-based estimation of the avian tree. *Science*, 346(6215):1250463.
- Mori, A. and Moli, F. L. (1998). Mating behavior and colony founding of the slave-making ant *Formica sanguinea* (Hymenoptera: Formicidae). *Journal of Insect Behavior*, 11(2):235–245.
- Münch, W. (1991). *Die Ameisen des Federsee-Gebietes: eine faunistisch-ökologische Bestandsaufnahme*. PhD thesis, Eberhard-Karls-Universität Tübingen.
- Muñoz-López, M., Palomeque, T., Carrillo, J. A., Pons, J., Tinaut, A., and Lorite, P. (2012). A new taxonomic status for *Iberoformica* (Hymenoptera, Formicidae) based on the use of molecular markers. *Journal of Zoological Systematics and Evolutionary Research*, 50(1):30–37.
- Nguyen, L.-T., Schmidt, H. A., von Haeseler, A., and Minh, B. Q. (2014). IQ-TREE: a fast and effective stochastic algorithm for estimating maximum-likelihood phylogenies. *Molecular Biology and Evolution*, 32(1):268–274.
- Nguyen, N. D., Mirarab, S., Kumar, K., and Warnow, T. (2015). Ultra-large alignments using phylogeny-aware profiles. *Genome Biology*, 16(1):124.
- Pamilo, P. and Rosengren, R. (1984). Evolution of nesting strategies of ants: genetic evidence from different population types of *Formica* ants. *Biological Journal of the Linnean Society*, 21(3):331–348.
- Pamilo, P., Sundström, L., Fortelius, W., and Rosengren, R. (1994). Diploid males and colony-level selection in *Formica* ants. *Ethology Ecology Evolution*, 6(2):221–235.
- Paradis, E. (2012). *Analysis of Phylogenetics and Evolution with R*. Springer Science & Business Media.
- Paradis, E., Claude, J., and Strimmer, K. (2004). APE: Analyses of phylogenetics and evolution in R language. *Bioinformatics*, 20(2):289–290.
- Pease, J. B., Brown, J. W., Walker, J. F., Hinchliff, C. E., and Smith, S. A. (2018). Quartet sampling distinguishes lack of support from conflicting support in the green plant tree of life. *American Journal of Botany*, 105(3):385–403.
- Preuß, G. (1956). Zum Vorkommen bemerkenswerter Ameisen in Schleswig-Holstein (Hym., Form.). *Faunistische Mitteilungen aus Norddeutschland*, 7:9–12.
- Preuß, G. (1957). Zur Kenntnis der Uralameise, *Formica uralensis* Ruzsky. *Faunistische Mitteilungen aus*

- Norddeutschland*, 8:2–4.
- Revell, L. J. (2011). phytools: an R package for phylogenetic comparative biology (and other things). *Methods in Ecology and Evolution*, 3(2):217–223.
- Roch, S. and Warnow, T. (2015). On the robustness to gene tree estimation error (or lack thereof) of coalescent-based species tree methods. *Systematic Biology*, 64(4):663–676.
- Rohland, N. and Reich, D. (2012). Cost-effective, high-throughput DNA sequencing libraries for multiplexed target capture. *Genome Research*, 22(5):939–946.
- Romiguier, J., Rolland, J., Morandin, C., and Keller, L. (2018). Phylogenomics of palearctic *Formica* species suggests a single origin of temporary parasitism and gives insights to the evolutionary pathway toward slave-making behaviour. *BMC Evolutionary Biology*, 18:e40.
- Ruano, F. and Tinaut, A. (2005). Mating behaviour in a slave-making ant, *Rossomyrmex minuchae* (Hymenoptera, Formicidae). *Naturwissenschaften*, 92(7):328–331.
- Sather, D. (1972). *Nest morphogenesis and population ecology of two species of Formica*. PhD thesis, University of North Dakota.
- Savolainen, R. and Deslippe, R. J. (2001). Facultative and obligate slave making in *Formica* ants. *Naturwissenschaften*, 88(8):347–350.
- Sayyari, E., Whitfield, J. B., and Mirarab, S. (2017). Fragmentary gene sequences negatively impact gene tree and species tree reconstruction. *Molecular Biology and Evolution*, 34(12):3279–3291.
- Seifert, B. (2000). A taxonomic revision of the ant subgenus *Coptoformica* Mueller, 1923 (Hymenoptera, Formicidae). *Zoosystema*, (22):517–568.
- Seifert, B. (2002). A taxonomic revision of the *Formica cinerea* group (Hymenoptera: Formicidae). *Abhandlungen und Berichte des Naturkundemuseums Görlitz*, 74(2):245–272.
- Seifert, B. (2004). The "Black Bog Ant" *Formica picea* Nylander, 1846 - a species different from *Formica candida* Smith, 1878 (Hymenoptera: Formicidae). *Myrmecologische Nachrichten*, 6:29–38.
- Seifert, B. (2007). *Die Ameisen Mittel- und Nordeuropas*. Lutra Verlags- und Vertriebsgesellschaft, Tauer.
- Seifert, B. (2018). *The ants of Central and North Europe*. Lutra Verlags- und Vertriebsgesellschaft, Tauer.
- Seifert, B. and Schultz, R. (2009a). A taxonomic revision of the *Formica rufibarbis* Fabricius, 1793 group (Hymenoptera: Formicidae). *Myrmecological News*, 12:255–272.
- Seifert, B. and Schultz, R. (2009b). A taxonomic revision of the *Formica subpilosa* Ruzsky, 1902 group (Hymenoptera: Formicidae). *Myrmecological News*, 12:67–83.
- Seppä, P., Helanterä, H., Chernenko, A., Trontti, K., Punttila, P., and Sundström, L. (2009). Population genetics of the black ant *Formica lemmani* (Hymenoptera: Formicidae). *Biological Journal of the Linnean Society*, 97(2):247–258.
- Skibińska, E. (1982). L'étude du phénomène de la monogynie et de la polygynie chez *Formica (Coptoformica) exsecta* Nyl. *Memorabilia Zoologica*, 38:67–111.
- Snelling, R. R. and Buren, W. F. (1985). Description of a new species of slave-making ant in the *Formica sanguinea* group (Hymenoptera: Formicidae). *Great Lakes Entomologist*, 18(2):69–78.
- Snyder, L. E. (1992). The genetics of social behavior in a polygynous ant. *Naturwissenschaften*, 79(11):525–527.
- Sorensen, U. and Schmidt, G. (1982). Die hügelbauenden Waldameisen in Waldgebieten der Bredstedter

- Geest (Schleswig-Holstein) (Genus *Formica*, Insecta). *Zeitschrift für Angewandte Zoologie*, 70(3):285–319.
- Tagliacollo, V. A. and Lanfear, R. (2018). Estimating improved partitioning schemes for ultraconserved elements. *Molecular Biology and Evolution*, 35(7):1798–1811.
- Talbot, M. (1972). Flights of the ant *Formica dakotensis* Emery. *Psyche*, (78):169–179.
- Talbot, M. (1977). The natural history of the workerless ant parasite *Formica talbotae*. *Psyche*, 83(3-4):282–288.
- Talbot, M. (2012). The natural history of ants of michigan's es george reserve: A 26 year study. *Miscellaneous Publications of the Museum of Zoology, University of Michigan*, (202):1–288.
- Tan, G., Muffato, M., Ledergerber, C., Herrero, J., Goldman, N., Gil, M., and Dessimoz, C. (2015). Current methods for automated filtering of multiple sequence alignments frequently worsen single-gene phylogenetic inference. *Systematic Biology*, 64(5):778–791.
- Tinaut, A. (1990). Descripción del macho de *Formica subrufa* Roger, 1859 y creación de un nuevo subgénero (Hymenoptera: Formicidae). *EOS. Revista Española de Entomología*, 65(2):281–291.
- Trager, J. C. (2013). Global revision of the dulotic ant genus *Polyergus* (Hymenoptera: Formicidae, Formicinae, Formicini). *Zootaxa*, 3722(4):501–548.
- Trager, J. C., MacGown, J. A., and Trager, M. D. (2007). Revision of the Nearctic endemic *Formica pallidiflava* group. *Memoirs of the American Entomological Institute*, 80:610–636.
- Wasmann, E. (1902). Neues über die zusammengesetzten Nester und gemischten Kolonien der Ameisen [part]. *Allgemeine Zeitschrift für Entomologie*, 7:1–5.
- Wheeler, W. M. (1904). A new type of social parasitism among ants. *Bulletin of the American Museum of Natural History*, 20(30):347–375.
- Wheeler, W. M. (1913). A revision of the ants of the genus *Formica* (Linné) Mayr. *Bulletin of the Museum of Comparative Zoology*, 53(10):379–565.
- Wilson, E. O. (1977). The first workerless parasite in the ant genus *Formica* (Hymenoptera: Formicidae). *Psyche*, 83(3-4):277–281.
- Yang, Z. (2007). PAML 4: Phylogenetic analysis by maximum likelihood. *Molecular Biology and Evolution*, 24(8):1586–1591.
- Zhang, C., Rabiee, M., Sayyari, E., and Mirarab, S. (2018). ASTRAL-III: polynomial time species tree reconstruction from partially resolved gene trees. *BMC Bioinformatics*, 19(6):153.
- Zhu, D., Chapuisat, M., and Pamilo, P. (2003). Highly variable social organisation of colonies in the ant *Formica cinerea*. *Hereditas*, 139(1):7–12.
